# Supplementary material for: The Kinetic and Analytical Aspects of Enzyme Competitive Inhibition: Sensing of Tyrosinase Inhibitors
Source: MDPI journal article supplement (doi:10.3390/bios11090322), 2021-09-08
Supplement: s1 [file s1]

## Supplementary materials

# The Kinetic and Analytical Aspects of Enzyme Competitive Inhibition: Sensing of Tyrosinase Inhibitors

Raouia Attaallah, Aziz Amine\*

*Faculty of Sciences and Techniques, Hassan II University of Casablanca, PA 146 Mohammedia, 20800, Morocco*

\* Corresponding author: Tel.: +212 661 455198, Fax +212 523 315353. a.amine@univh2m.ac.ma

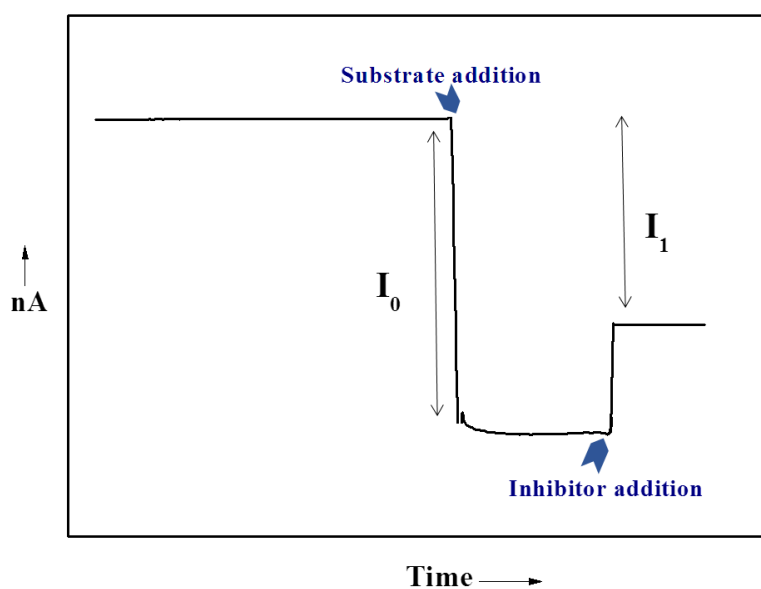

**Figure S1.** Typical inhibition biosensor response in the absence ( $I_0$ ), and in the presence of inhibitor ( $I_1$ ).

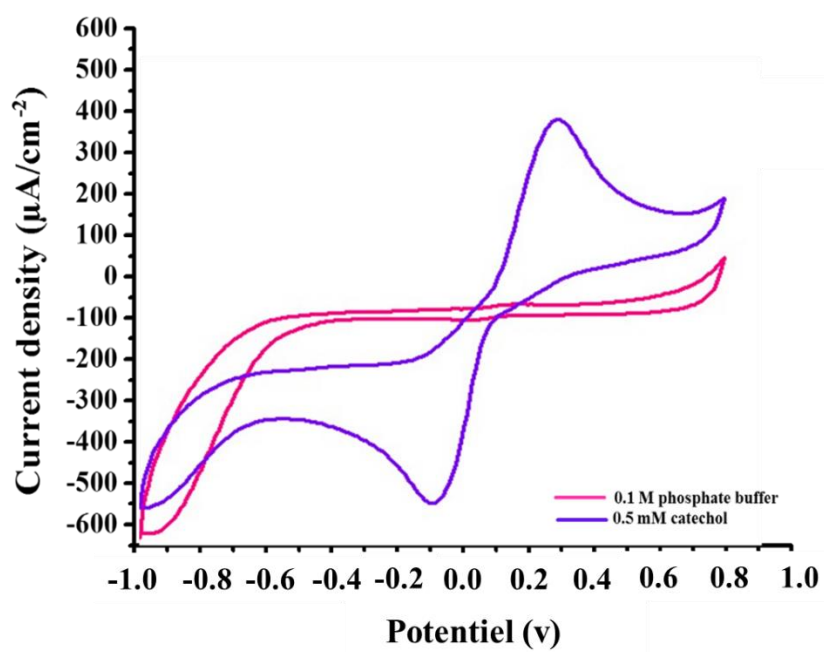

**Figure S2.** Cyclic voltammetry of 0.5 mM catechol with Tyr-CBPE in 0.1 M phosphate buffer pH 6.8, scan rate of  $50 \text{ mV} \cdot \text{s}^{-1}$ .

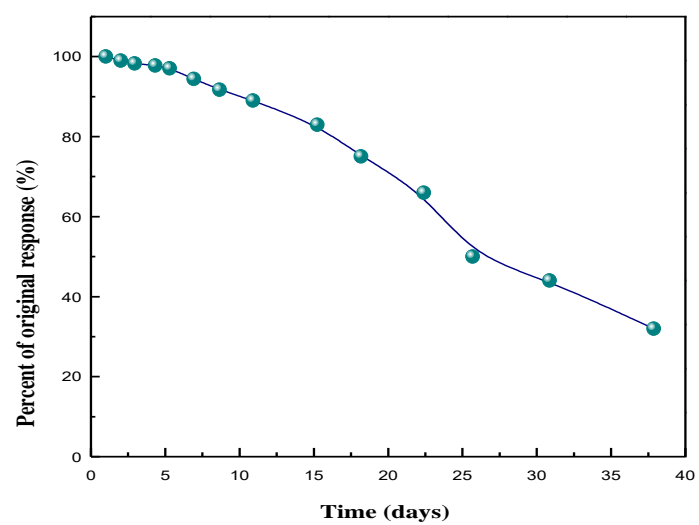

**Figure S3.** Relative response of tyrosinase as a function of the storage time. In the presence of 20  $\mu$ M catechol in 0.1 M phosphate buffer, pH 6.8. Applied potential -0.15 V vs Ag/AgCl.
